# Supplementary material for: A supercapacitive all-inorganic nano metal–oxide complex: a 180° super-bendable asymmetric energy storage device
Source: Royal Society of Chemistry journal article supplement (doi:10.1039/d3tc02677a), 2023-01-01
Supplement: d3tc02677a1.pdf [file d3tc02677a1.pdf]

*Supporting Information*

Supercapacitive All-Inorganic Nano Metal-Oxides' Complex: A 180°  
Super-Bendable Asymmetric Energy Storage Device

Love Bansal<sup>1</sup>, Suchita Kandpal<sup>1</sup>, Tanushree Ghosh<sup>1</sup>, Chanchal Rani<sup>1,§</sup>, Bhumika Sahu<sup>1</sup>, Deb  
Kumar Rath<sup>1</sup> and Rajesh Kumar<sup>1,2\*</sup>

<sup>1</sup> Materials and Device Laboratory, Department of Physics, Indian Institute of Technology  
Indore, Simrol-453552, India

<sup>2</sup> Centre for Advanced Electronics, Indian Institute of Technology Indore, Simrol-453552,  
India

<sup>§</sup> *Current Address: Department of Chemistry, University of Michigan, Ann Arbor, Michigan  
48109, United States of America*

\*Email: [rajeshkumar@iiti.ac.in](mailto:rajeshkumar@iiti.ac.in)

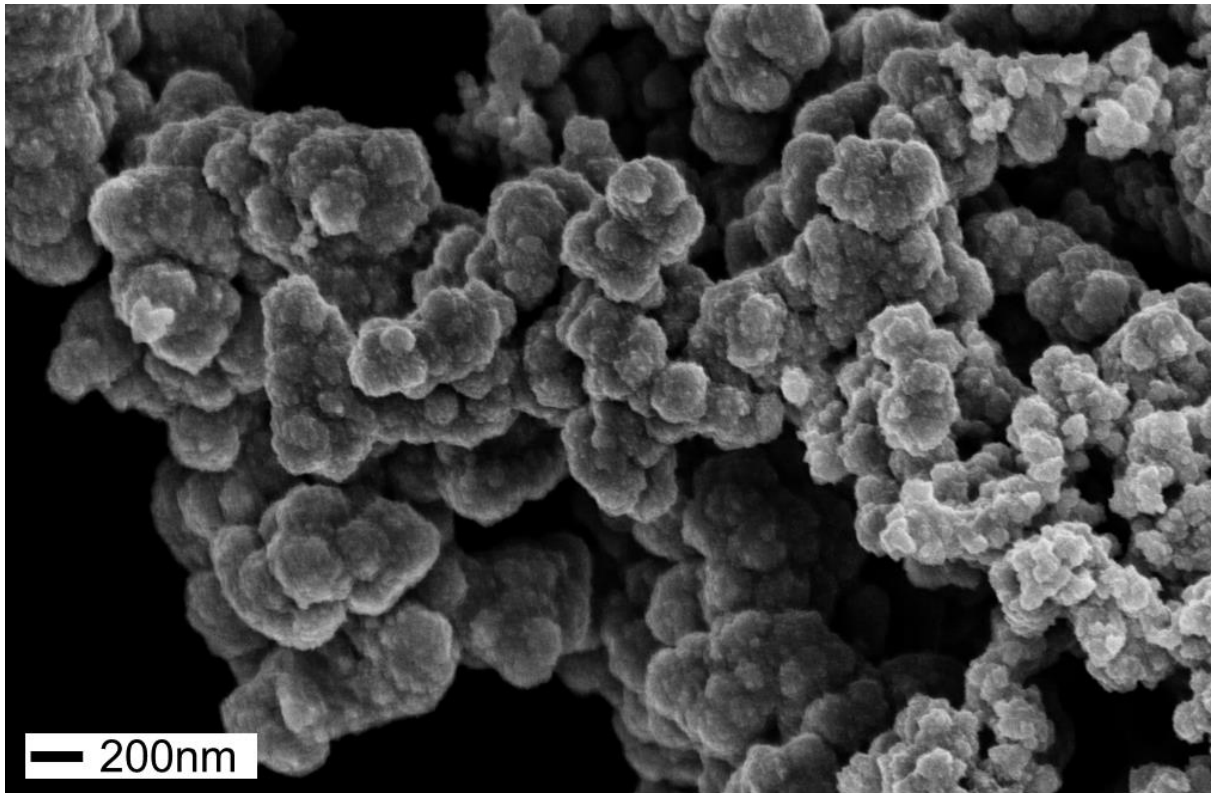

Figure S1: High resolution SEM image of WO<sub>3</sub> electrode.

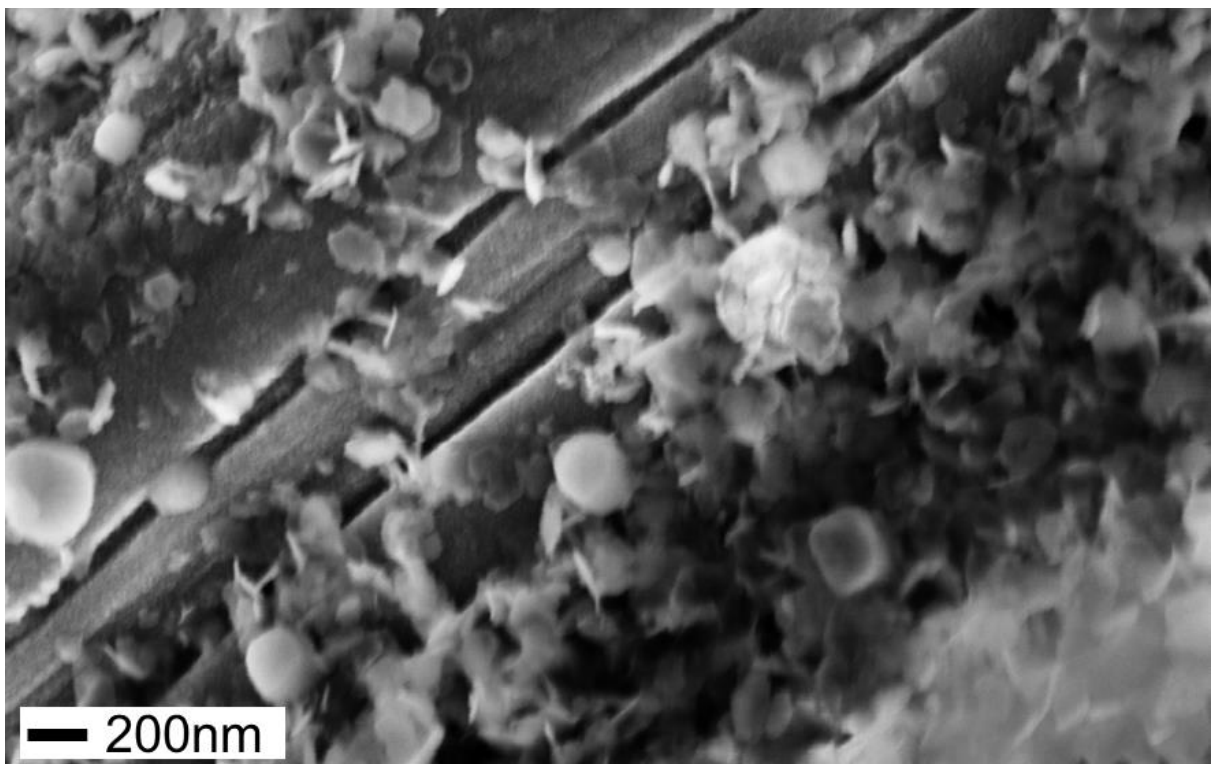

Figure S2: High resolution SEM image of Co<sub>3</sub>O<sub>4</sub> electrode.

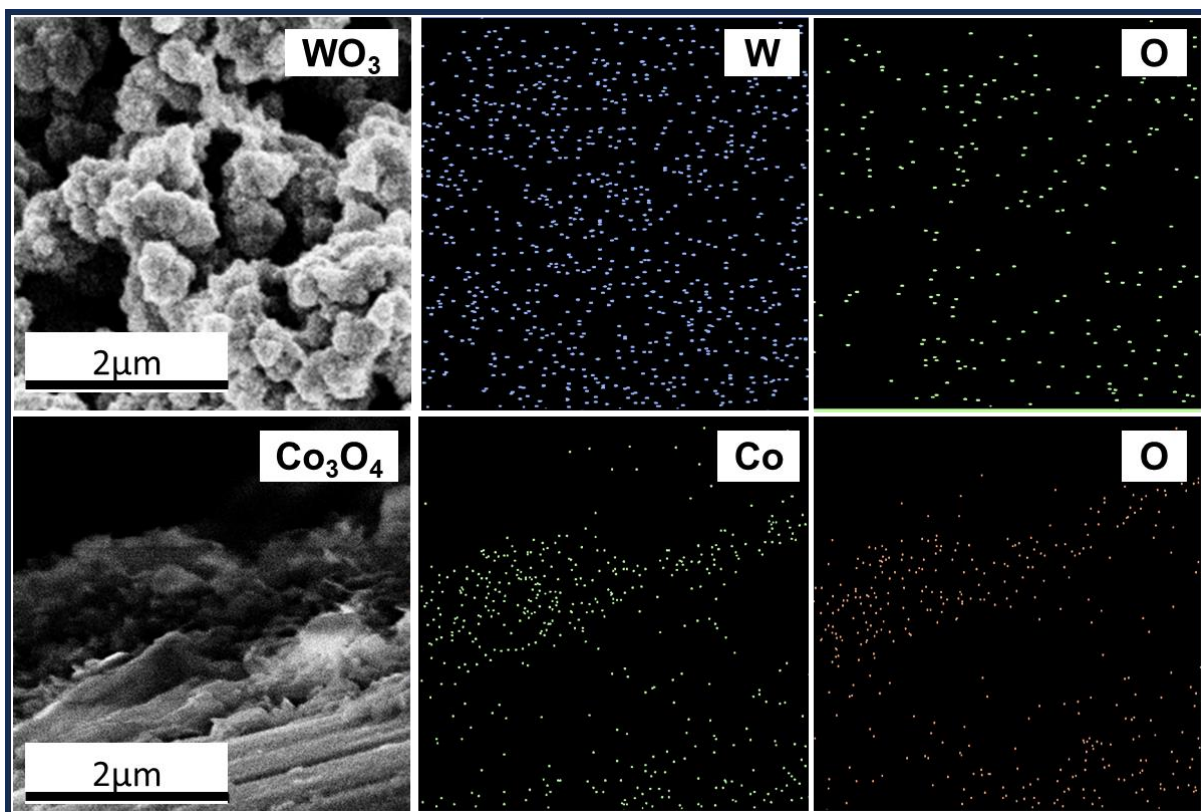

Figure S3: EDX spectra of  $\text{Co}_3\text{O}_4$  and  $\text{WO}_3$  electrodes with elemental mapping

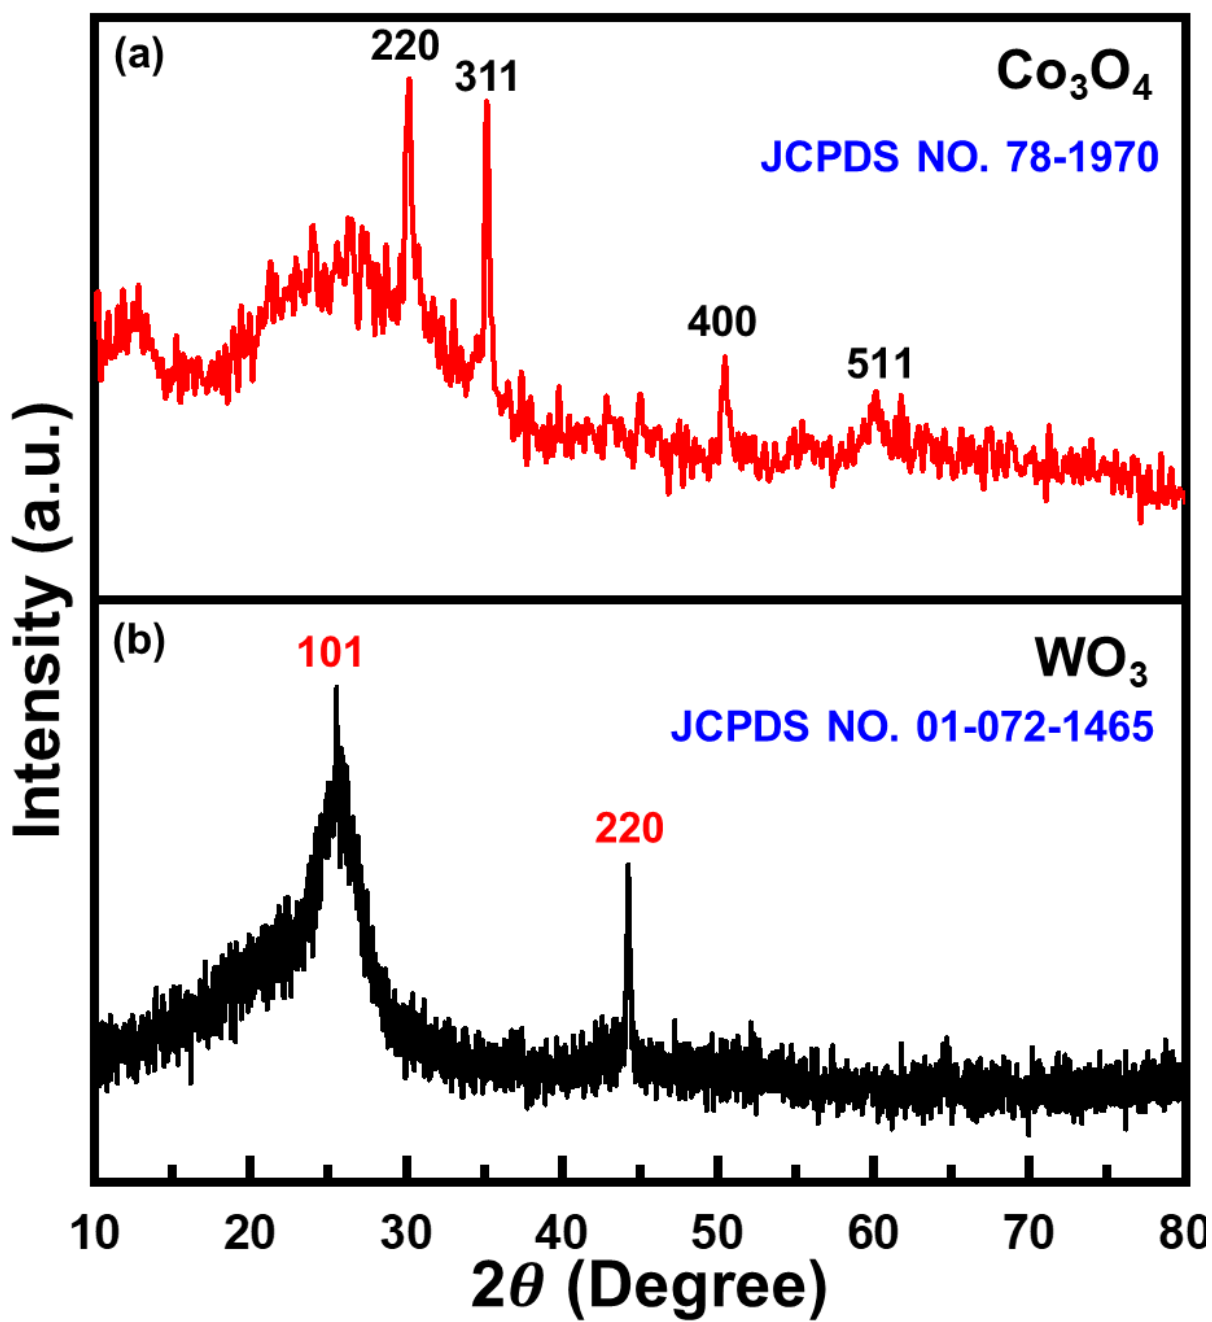

Figure S4: XRD pattern of (a)  $\text{Co}_3\text{O}_4$ , and (b)  $\text{WO}_3$  electrodes on carbon cloth.

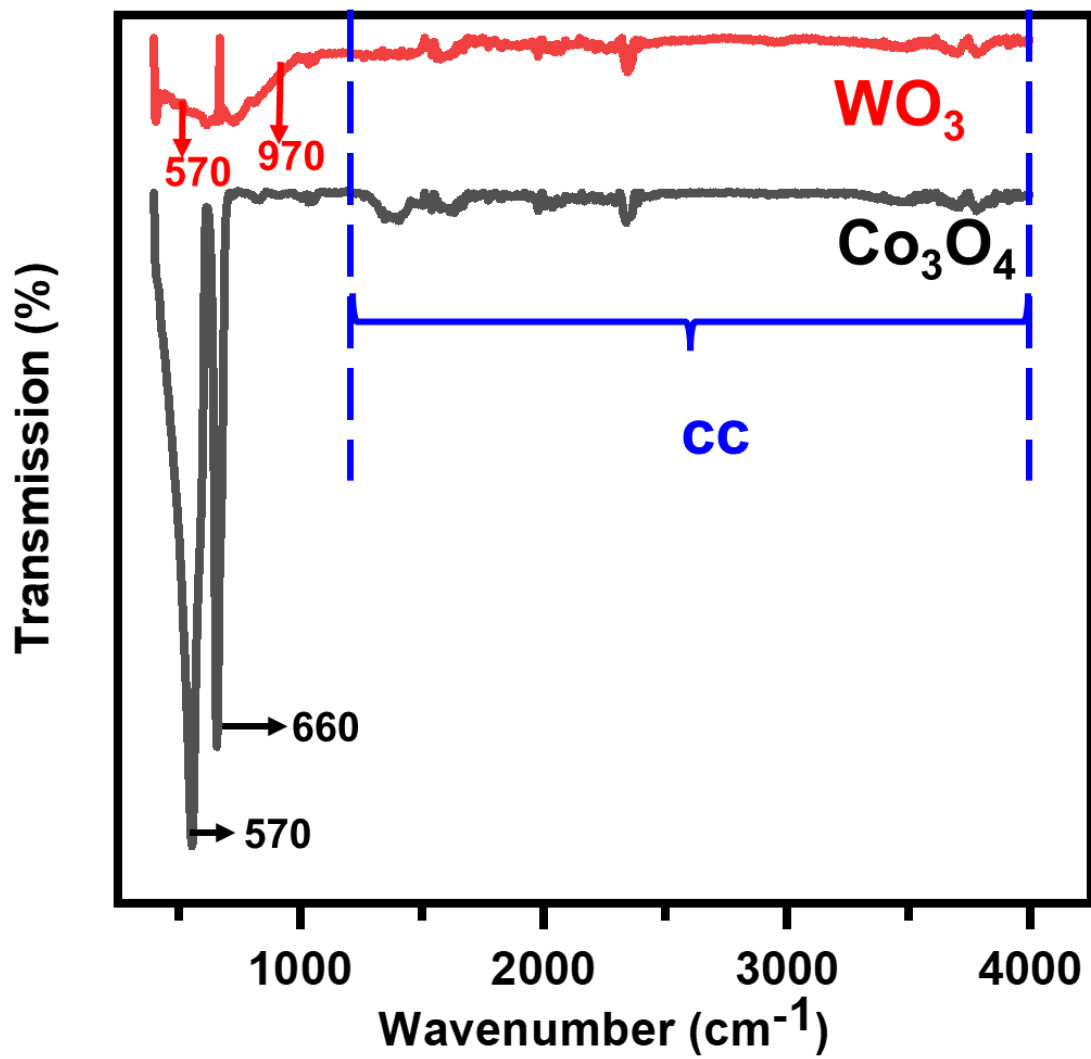

Figure S5: FTIR spectra of WO<sub>3</sub> and Co<sub>3</sub>O<sub>4</sub> on CC.

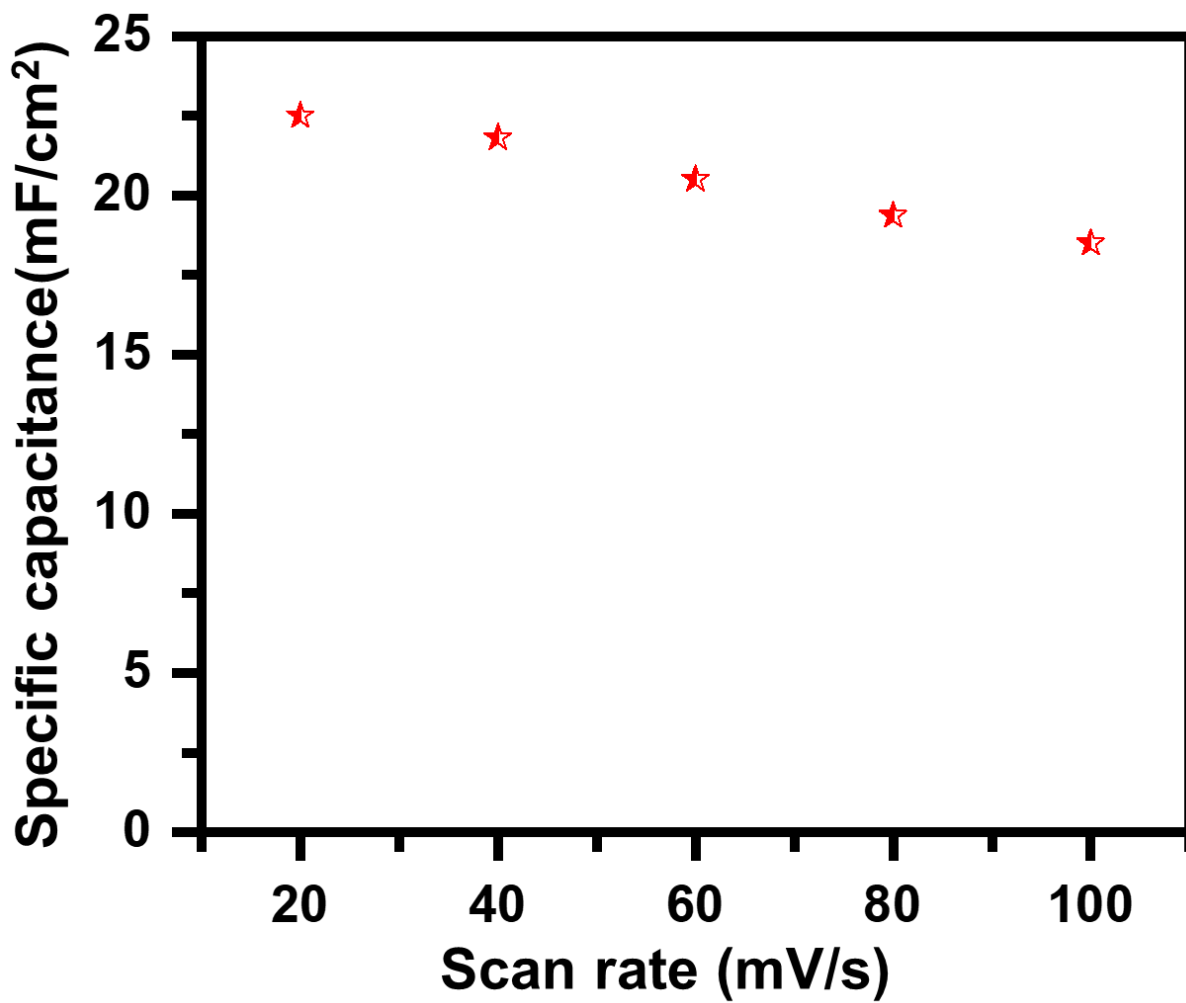

Figure S6: Variation of specific capacitance with scan rate for WO<sub>3</sub> electrode.

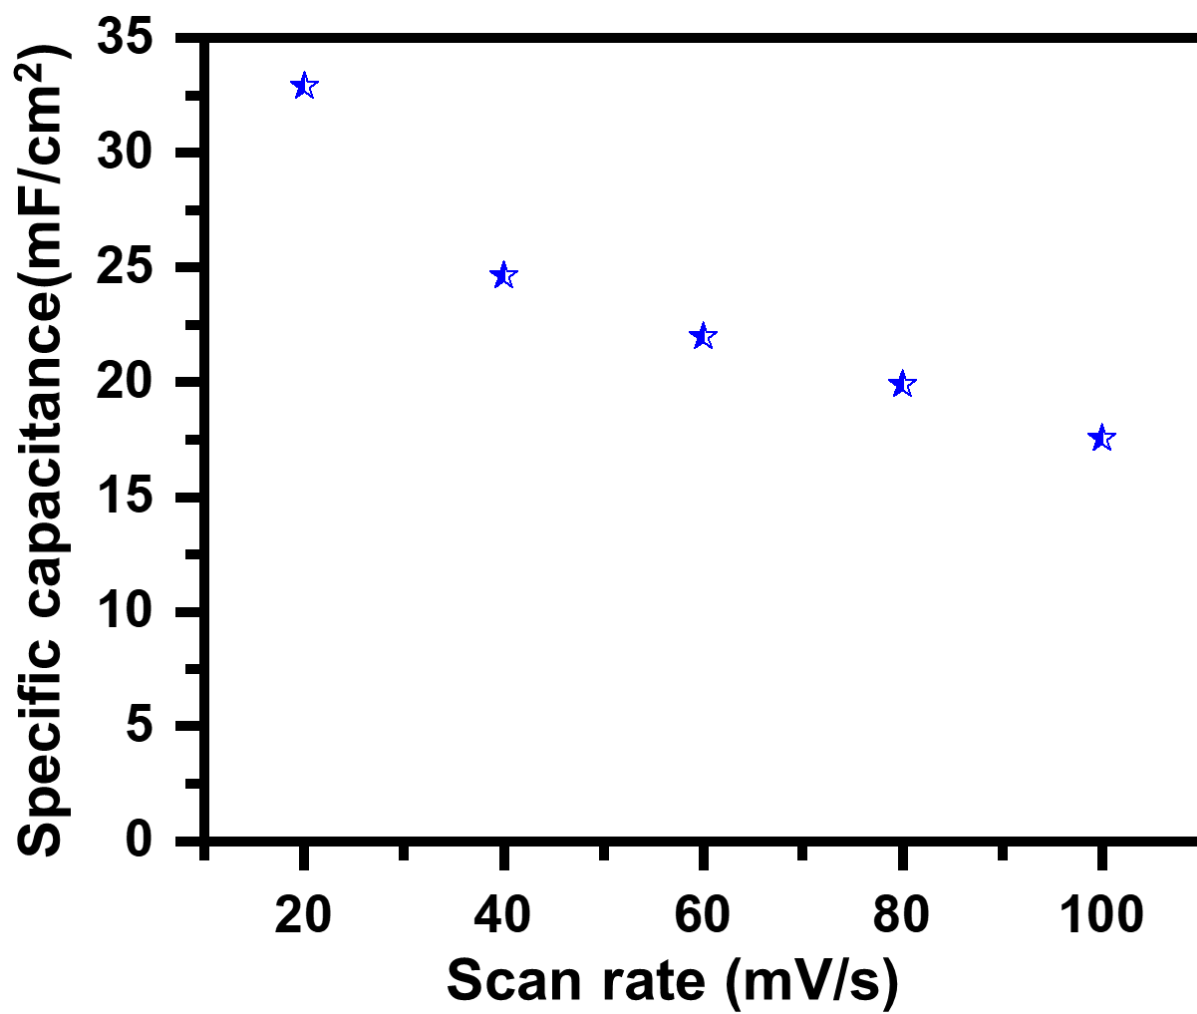

Figure S7: Variation of specific capacitance with scan rate for  $\text{Co}_3\text{O}_4$  electrode.

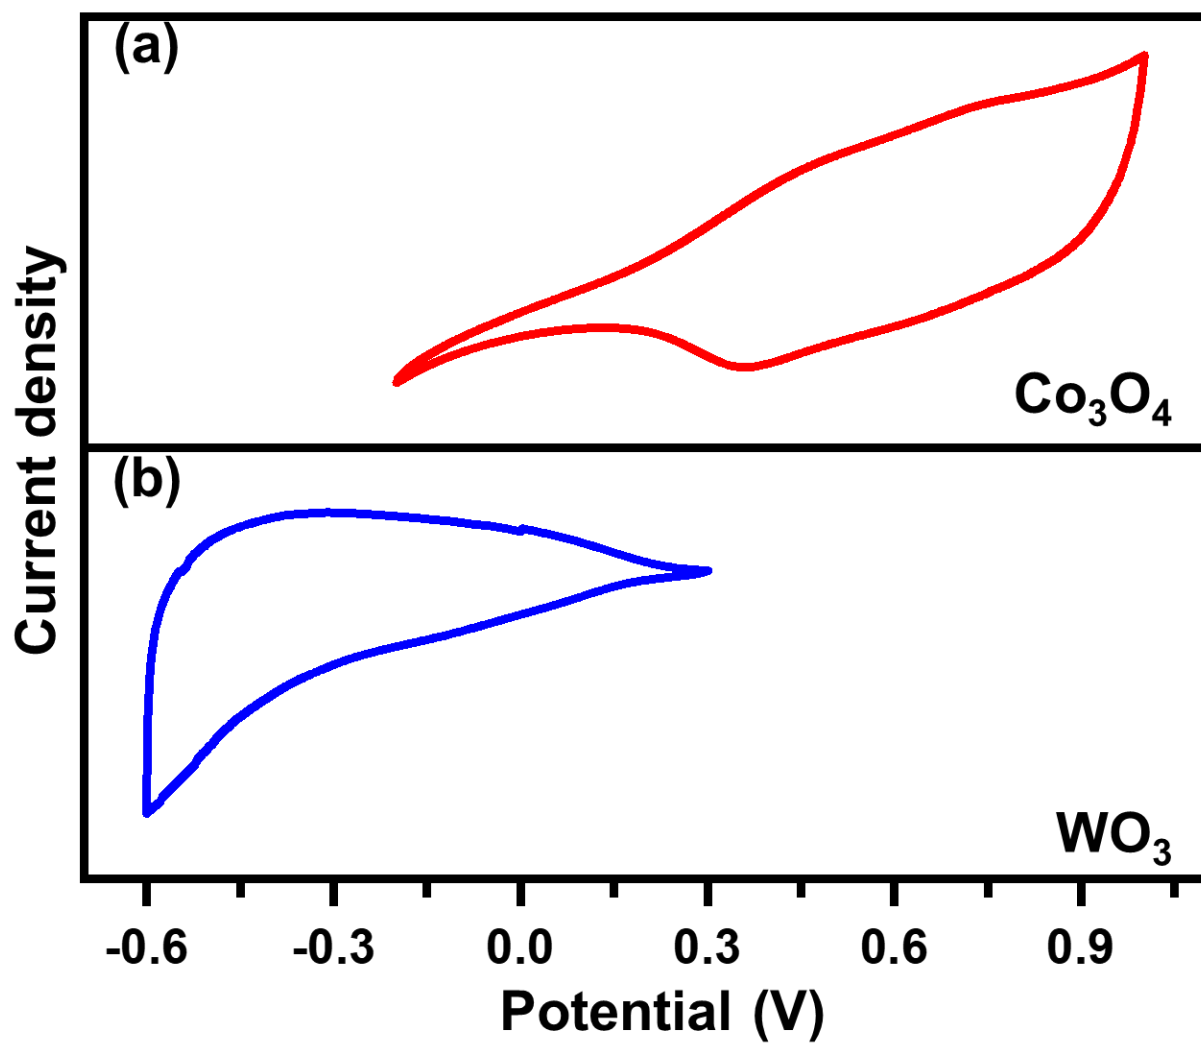

Figure S8: CV plots of (a)  $\text{Co}_3\text{O}_4$  and (b)  $\text{WO}_3$  electrodes at 20 mV/s.



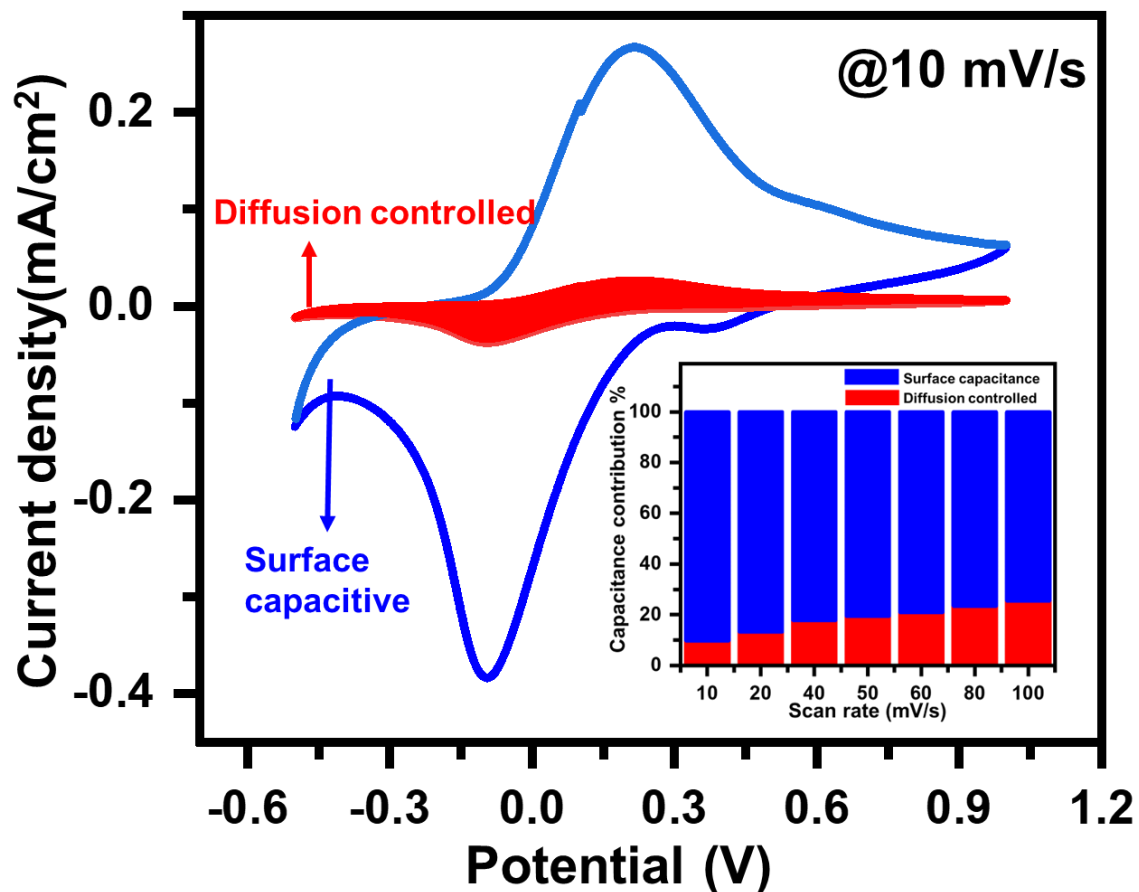

Figure S9: Areal representation (Inset: Histogram representation) of diffusion-controlled specific capacitance and surface-controlled specific capacitance of SSFSC  $\text{Co}_3\text{O}_4/\text{WO}_3$  device.

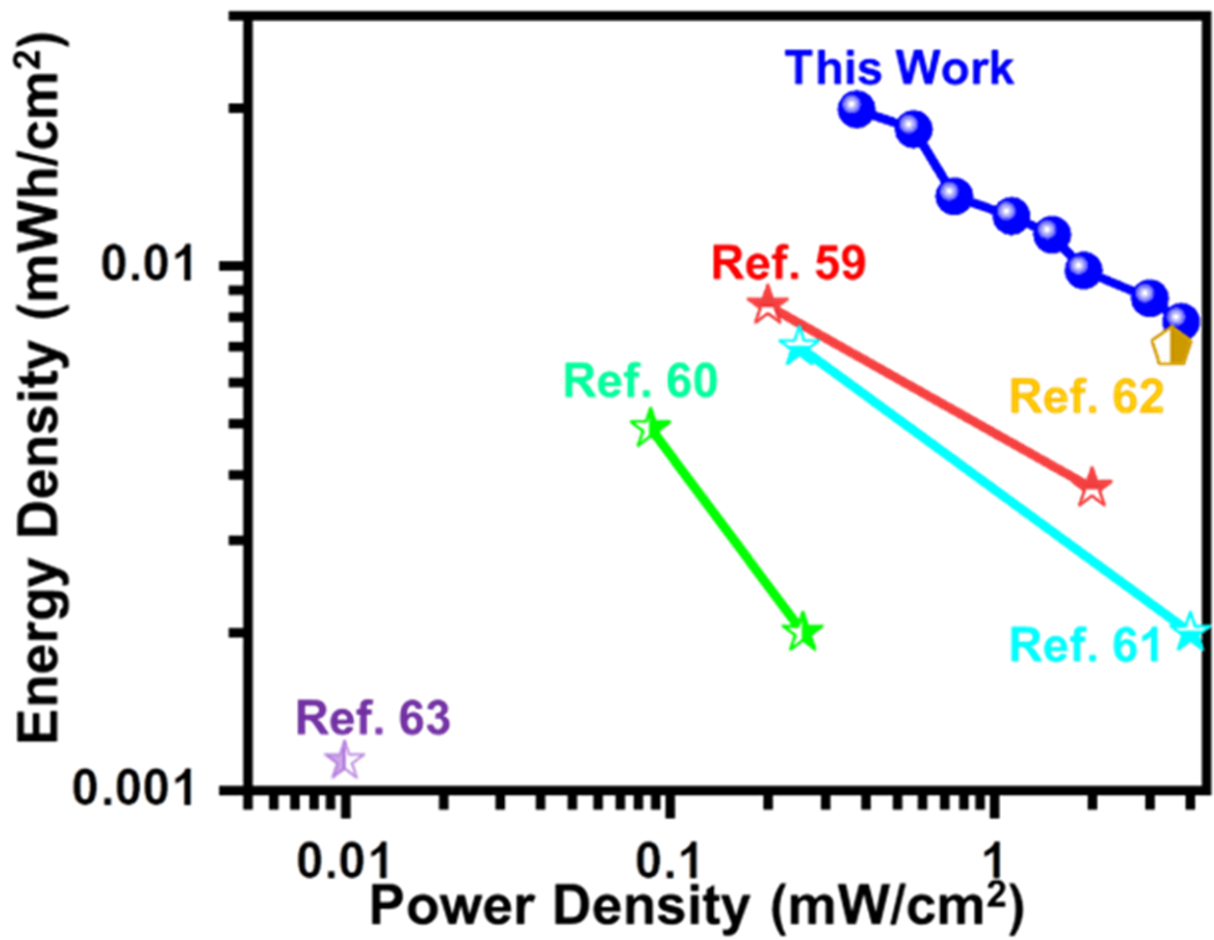

Figure S10: Comparative Ragone plot of Co<sub>3</sub>O<sub>4</sub>//WO<sub>3</sub> SSFSC device with already reported flexible supercapacitor device.
